# Supplementary material for: Ursolic Acid Inhibits Breast Cancer Metastasis by Suppressing Glycolytic Metabolism via Activating SP1/Caveolin-1 Signaling
Source: PubMed Central journal article supplement (PMC8457520; doi:10.3389/fonc.2021.745584), 2021-09-08
Supplement: DataSheet_1.pdf [file DataSheet_1.pdf]

## Supplementary Material

### 1 Supplementary Figures

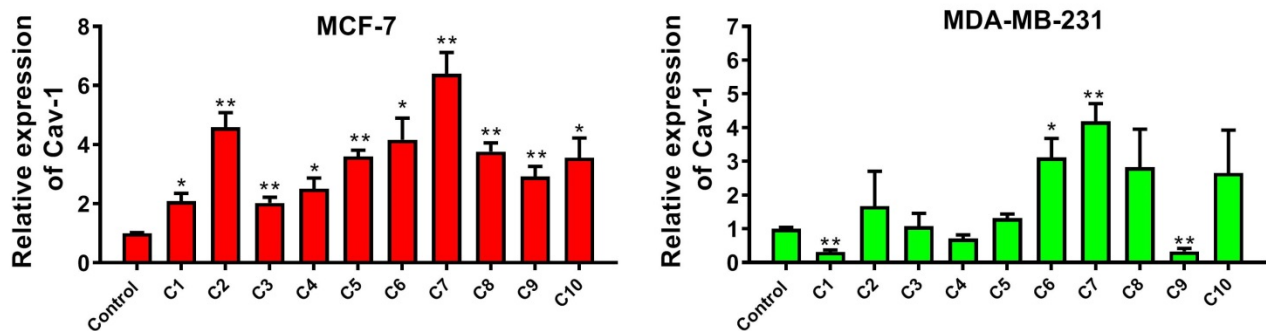

**Supplementary Figure 1.** Statistical analyses of the relative protein expression levels of the bands in Figure 1E. Relative protein expression levels were quantified by densitometric analyses of protein bands using the Gel-Pro analyzer 4 software. N = 3, \* $P < 0.05$ , \*\* $P < 0.01$ .

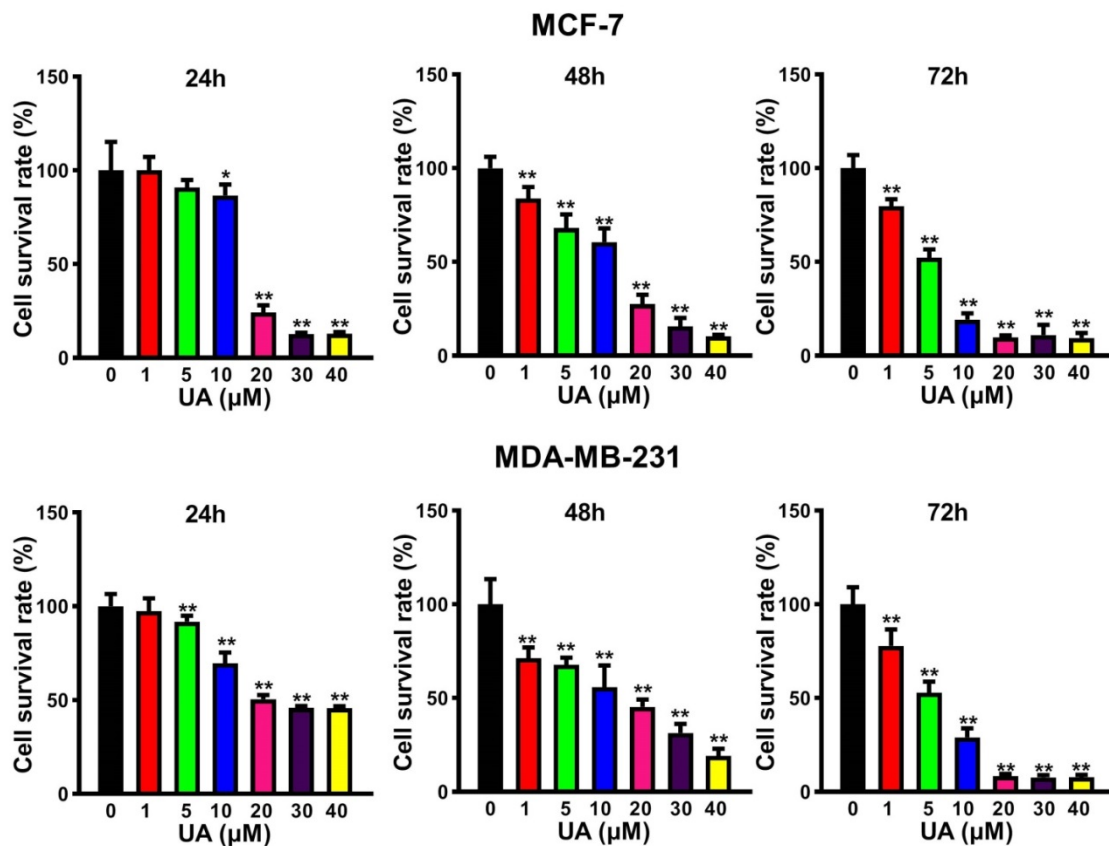

**Supplementary Figure 2.** The statistical analyses of cell survival rates of breast cancer cells. MCF-7 and MDA-MB-231 cells were treated with 1~40  $\mu\text{M}$  ursolic acid for 24~72 h. CCK8 assay was conducted to detect their survival rates. N = 8, \* $P < 0.05$ , \*\* $P < 0.01$ .

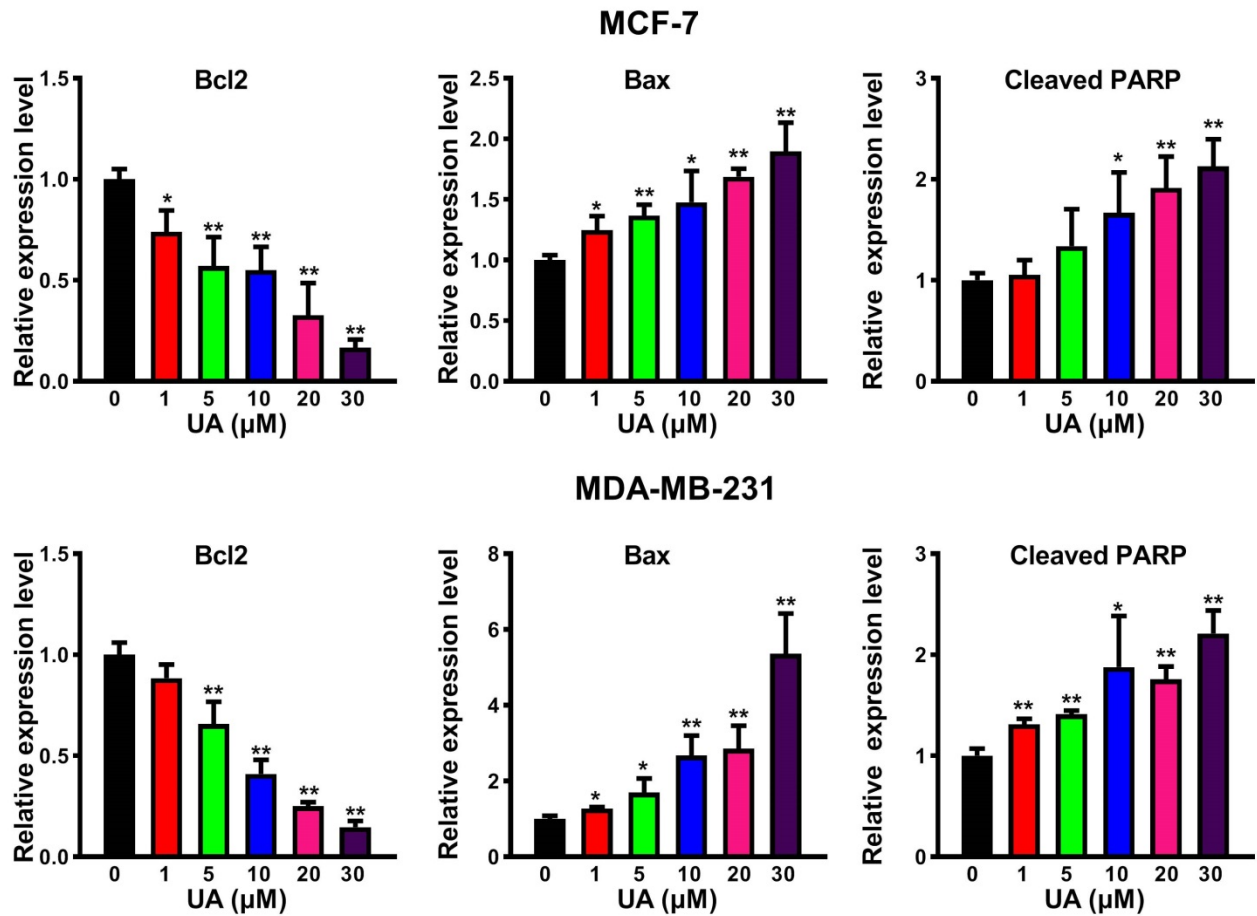

**Supplementary Figure 3.** Statistical analyses of the relative protein expression levels of the bands in Figure 2F. N = 3, \*  $P < 0.05$ , \*\*  $P < 0.01$ .

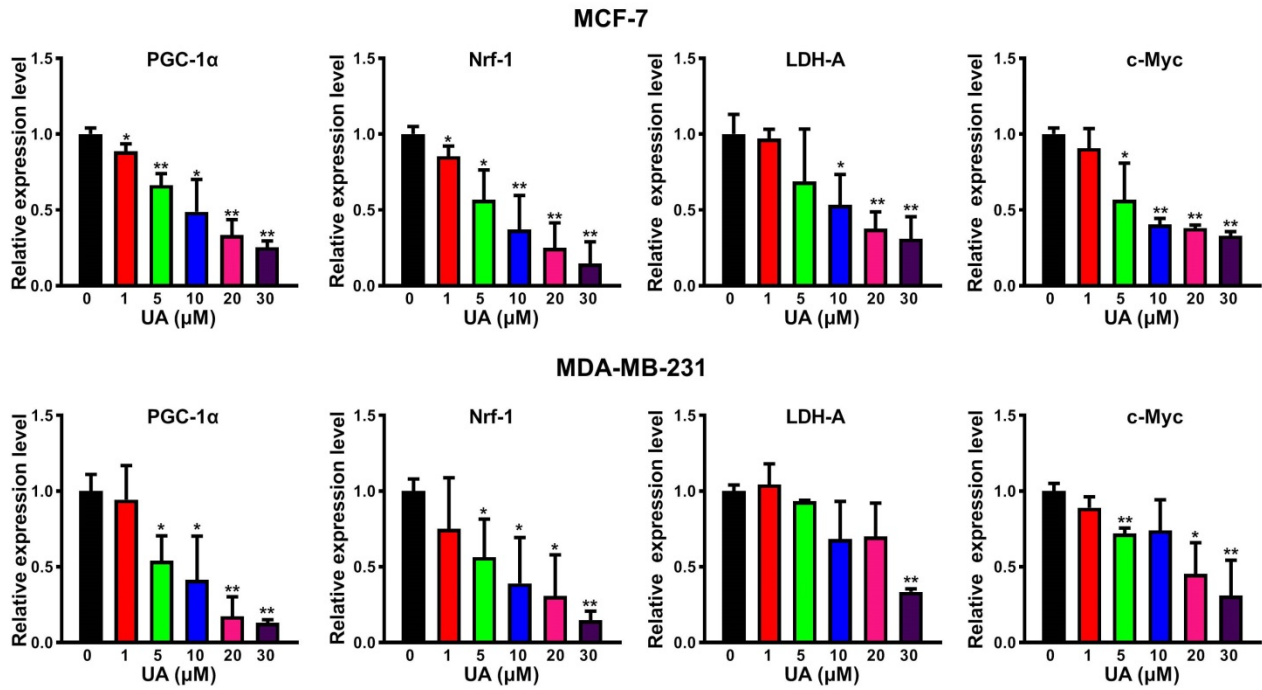

**Supplementary Figure 4.** Statistical analyses of the relative protein expression levels of the bands in Figure 3D. N = 3, \* $P < 0.05$ , \*\* $P < 0.01$ .

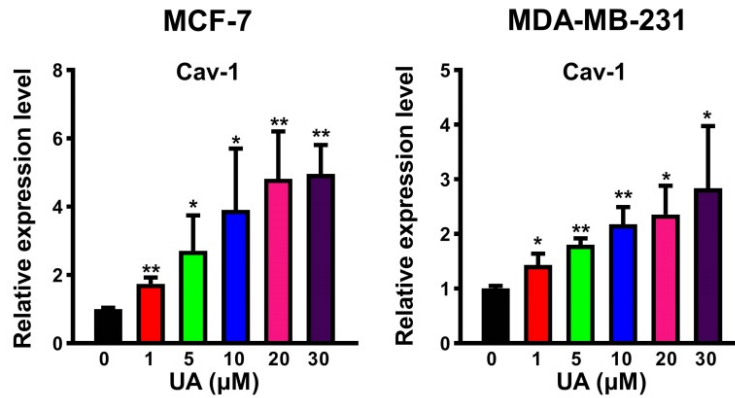

**Supplementary Figure 5.** Statistical analyses of the relative protein expression levels of the bands in Figure 4B. N = 3, \* $P < 0.05$ , \*\* $P < 0.01$ .

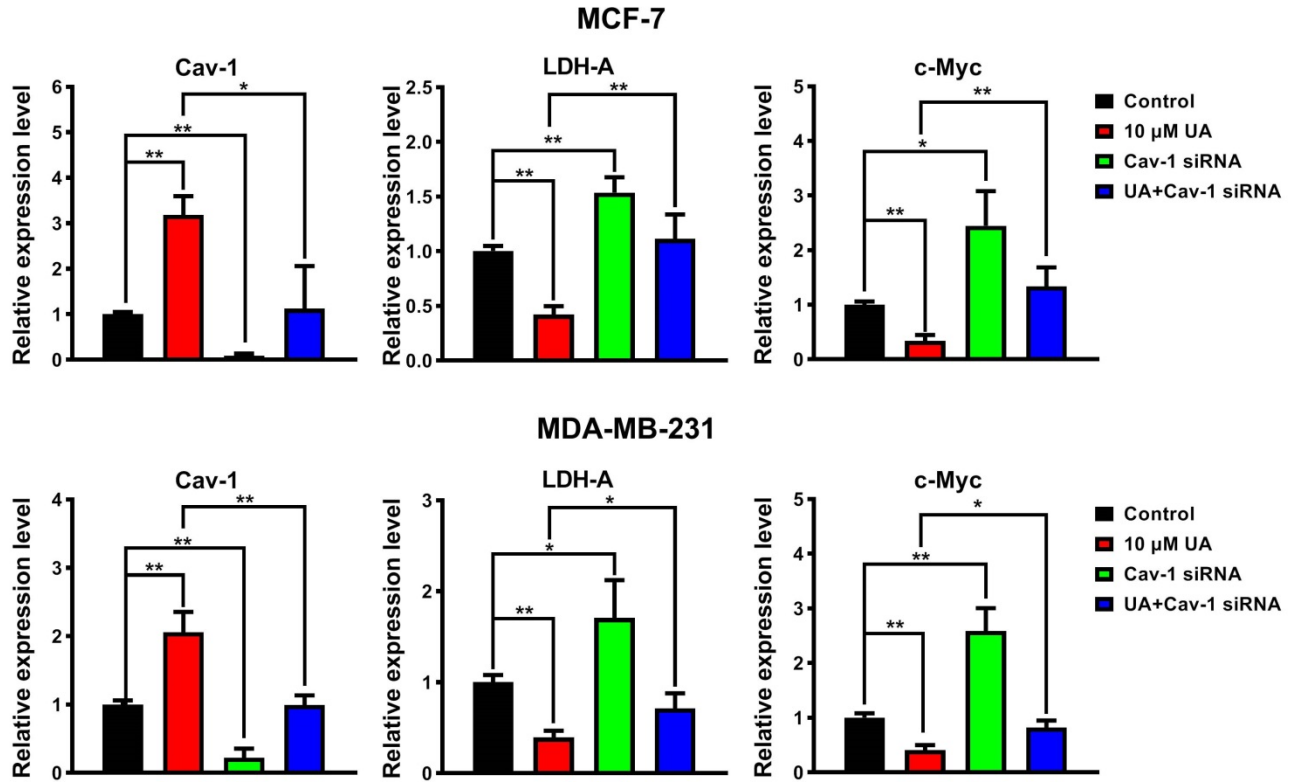

**Supplementary Figure 6.** Statistical analyses of the relative protein expression levels of the bands in Figure 4F.  $N = 3$ , \*  $P < 0.05$ , \*\*  $P < 0.01$ .

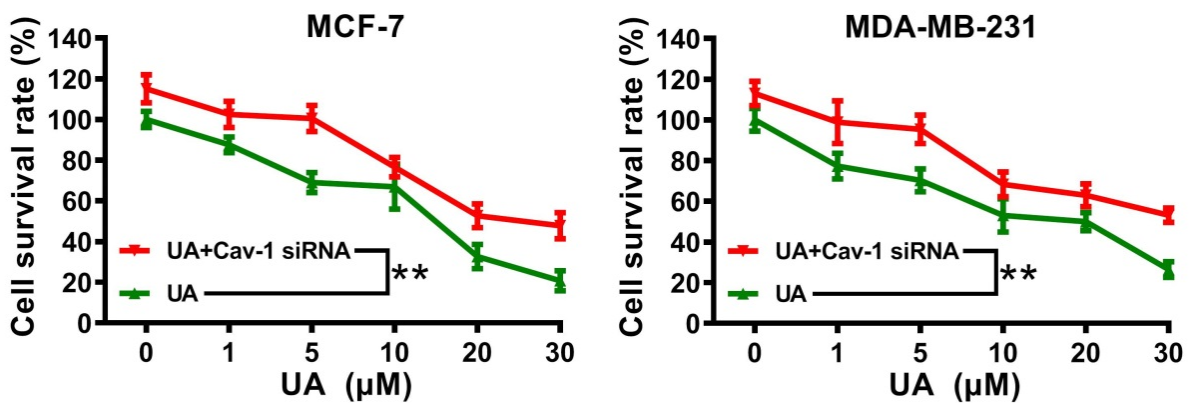

**Supplementary Figure 7.** The effect of Cav-1 knockdown on the growth of ursolic acid-treated breast cancer cells. MCF-7 and MDA-MB-231 cells were transfected with Cav-1 specific siRNAs and then treated with 1~30  $\mu$ M ursolic acid for 48 h. Cell survival rates were detected using the CCK8 assay.  $N = 3$ , \*  $P < 0.01$ .

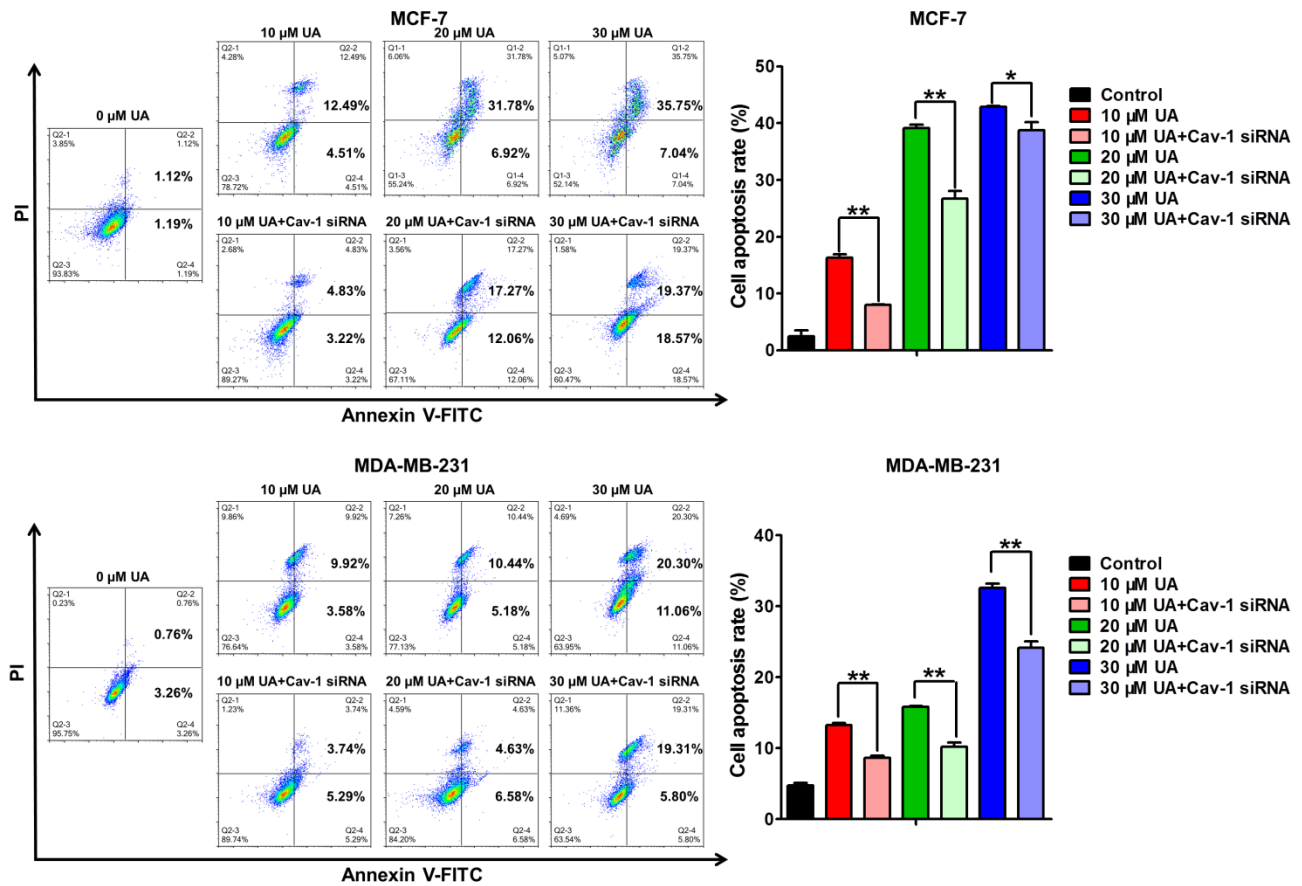

**Supplementary Figure 8.** The effect of Cav-1 knockdown on the apoptosis of ursolic acid-treated breast cancer cells. MCF-7 and MDA-MB-231 cells were transfected with Cav-1 specific siRNAs and then treated with 10~30  $\mu$ M ursolic acid for 48 h. Cell apoptosis rates were detected using the Annexin V-FITC/PI staining assay and flow cytometry. N = 3, \* $P$  < 0.05, \*\* $P$  < 0.01.

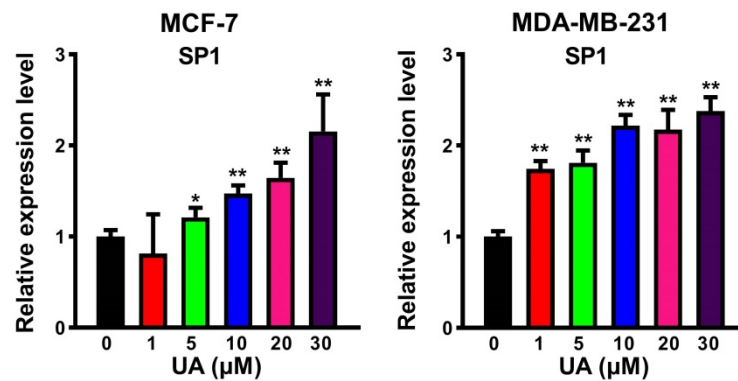

**Supplementary Figure 9.** Statistical analyses of the relative protein expression levels of the bands in Figure 5B. N = 3, \* $P$  < 0.05, \*\* $P$  < 0.01.

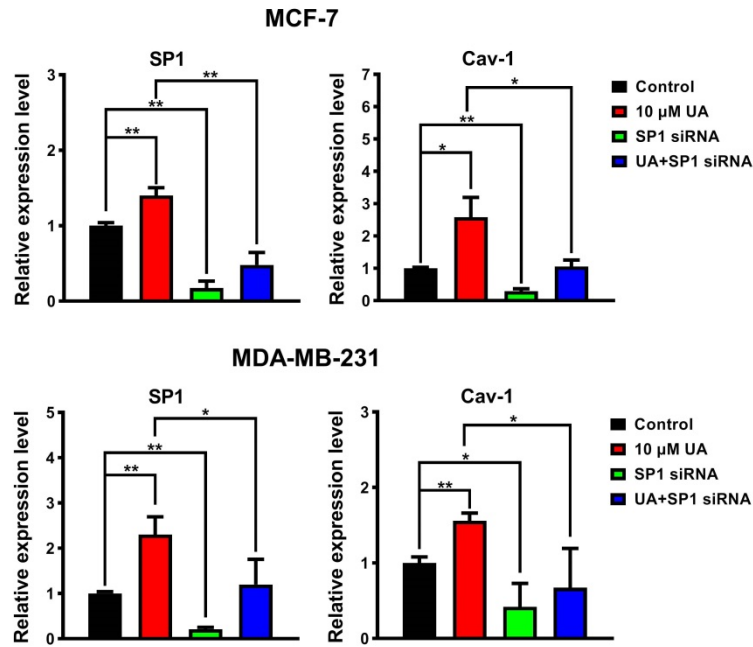

**Supplementary Figure 10.** Statistical analyses of the relative protein expression levels of the bands in Figure 5D. N = 3, \*  $P < 0.05$ , \*\*  $P < 0.01$ .

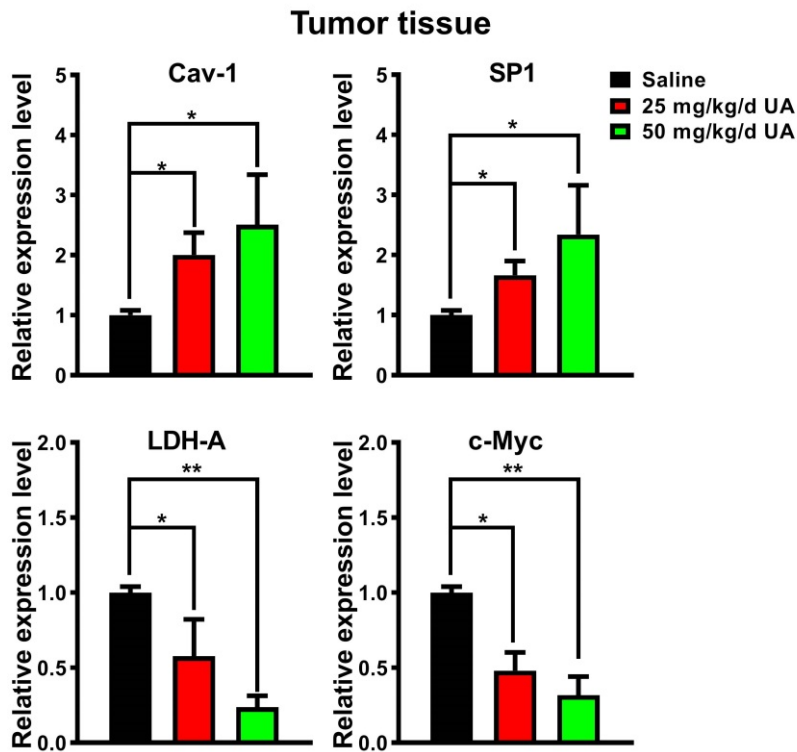

**Supplementary Figure 11.** Statistical analyses of the relative protein expression levels of the bands in Figure 6F. N = 3, \*  $P < 0.05$ , \*\*  $P < 0.01$ .
